# Supplementary material for: Contribution of Visible Surface Mold to Airborne Fungal Concentration as Assessed by Digital Image Quantification
Source: MDPI journal article supplement (doi:10.3390/pathogens10081032), 2021-08-15
Supplement: s1 [file s1]

| LOCATION_ID | DATE | AREA_RATIO | INDOOR_AIR | ID_CLA2 | ID_PEN2 | ID_ASP2 | ID_FUSARU_ID_GRO2 | ID_YEAR2 | ID_VER2 | ID_TOTAL | OUTDOOR_AIR | ID_CLA | ID_PEN | ID_ASP | ID_FUSARU_ID_GRO | ID_YEAR | ID_VER | ID_TOTAL | SURFACE | SURFACE_CL | SURFACE_PE | SURFACE_AS | SURFACE_OE | SURFACE_YE | SURFACE_VE | SURFACE_TO | ENVIRONMENT | ID_TEM | ID_RH | WIND_SPEED | CO2   | SURFACE_TEM | SURFACE_RH |
|-------------|------|------------|------------|---------|---------|---------|-------------------|----------|---------|----------|-------------|--------|--------|--------|------------------|---------|--------|----------|---------|------------|------------|------------|------------|------------|------------|------------|-------------|--------|-------|------------|-------|-------------|------------|
| 138         | 629  | 0.00280    | 3.65       | 59.01   | 4.80    | 0.79    | 0.79              | 0.79     | 0.79    | 64782    | 36.93       | 76.22  | 7.40   | 0.79   | 0.79             | 2.42    | 0.79   | 171.97   | 2.22    | 0.40       | 0.40       | 6.670      | 0.440      | 0.440      | 0.440      | 8.800      | 31.5        | 73.4   | 0.35  | 70.0       | 32.42 | 80.30       |            |
| 139         | 629  | 0.00070    | 88.11      | 173.38  | 7.31    | 0.79    | 0.79              | 0.79     | 0.79    | 208.60   | 36.93       | 76.22  | 7.40   | 0.79   | 0.79             | 2.42    | 0.79   | 171.97   | 0.440   | 0.440      | 0.440      | 6.667      | 0.440      | 0.440      | 0.440      | 6.667      | 31.5        | 73.4   | 0.35  | 70.0       | 32.42 | 80.30       |            |
| 13L         | 629  | 0.00000    | 0.59       | 10.48   | 0.79    | 0.79    | 0.79              | 0.79     | 0.79    | 221.44   | 36.93       | 76.22  | 7.40   | 0.79   | 0.79             | 2.42    | 0.79   | 171.97   | 0.44    | 0.40       | 0.40       | 0.440      | 0.440      | 0.440      | 0.440      | 0.440      | 30.9        | 73.3   | 0.26  | 60.0       | 32.87 | 73.93       |            |
| 148         | 629  | 0.00070    | 25.84      | 53.28   | 4.80    | 0.79    | 0.79              | 7.45     | 0.79    | 252.06   | 87.76       | 43.88  | 19.50  | 0.79   | 0.79             | 12.19   | 0.79   | 209.66   | 2.33    | 0.40       | 0.40       | 0.440      | 0.440      | 0.440      | 0.440      | 3.320      | 26.0        | 63.9   | 0.16  | 62.0       | 31.82 | 62.49       |            |
| 14L         | 629  | 0.00510    | 71.49      | 39.62   | 4.85    | 0.79    | 22.24             | 24.74    | 0.79    | 200.24   | 87.76       | 43.88  | 19.50  | 0.79   | 0.79             | 12.19   | 0.79   | 209.66   | 13.33   | 26.667     | 0.440      | 96.667     | 0.440      | 0.440      | 0.440      | 136.667    | 28.8        | 73.0   | 0.10  | 50.0       | 31.40 | 65.18       |            |
| 148         | 629  | 0.00000    | 4.937      | 39.19   | 0.79    | 0.79    | 0.79              | 17.06    | 0.79    | 127.21   | 16.49       | 35.34  | 7.07   | 0.79   | 0.79             | 2.36    | 0.79   | 105.65   | 0.44    | 0.40       | 0.40       | 0.440      | 0.440      | 0.440      | 0.440      | 0.440      | 31.7        | 70.0   | 0.18  | 80.0       | 32.10 | 63.76       |            |
| 14L         | 629  | 0.00000    | 25.84      | 53.28   | 7.20    | 0.79    | 0.79              | 13.10    | 0.79    | 201.44   | 87.76       | 43.88  | 19.50  | 0.79   | 0.79             | 12.19   | 0.79   | 209.66   | 13.33   | 26.667     | 0.440      | 96.667     | 0.440      | 0.440      | 0.440      | 136.667    | 28.8        | 73.0   | 0.10  | 50.0       | 31.40 | 65.18       |            |
| 158         | 650  | 0.00000    | 28.53      | 370.15  | 4.40    | 0.79    | 0.79              | 48.40    | 0.79    | 452.30   | 114.25      | 96.85  | 0.79   | 0.79   | 2.46             | 0.79    | 228.30 | 0.44     | 0.40    | 0.40       | 0.440      | 0.440      | 0.440      | 0.440      | 0.440      | 27.3       | 66.2        | 0.12   | 60.0  | 31.07      | 65.70 |             |            |
| 15L         | 650  | 0.00250    | 48.10      | 0.79    | 33.18   | 0.79    | 19.34             | 19.53    | 0.79    | 122.30   | 114.25      | 96.85  | 2.36   | 0.79   | 23.75            | 0.79    | 96.58  | 16.67    | 20.000  | 93.333     | 66.667     | 0.440      | 0.440      | 0.440      | 1036.667   | 29.7       | 61.6        | 0.07   | 50.0  | 31.05      | 70.70 |             |            |
| 238         | 718  | 0.00000    | 807.36     | 0.79    | 23.29   | 0.79    | 0.79              | 0.79     | 0.79    | 857.48   | 361.67      | 0.79   | 0.79   | 0.79   | 0.79             | 0.79    | 0.79   | 792.500  | 0.440   | 0.440      | 0.440      | 0.440      | 0.440      | 0.440      | 0.440      | 0.440      | 29.9        | 70.8   | 0.18  | 70.0       | 33.20 | 63.94       |            |
| 22L         | 718  | 0.00440    | 485.11     | 13.15   | 28.78   | 51.7    | 0.79              | 15.442   | 0.79    | 1031.80  | 351.16      | 0.79   | 43.58  | 5.15   | 0.79             | 341.47  | 0.79   | 751.47   | 62.840  | 0.440      | 0.440      | 0.440      | 0.440      | 0.440      | 0.440      | 623.600    | 33.5        | 58.8   | 0.01  | 80.0       | 35.08 | 59.07       |            |
| 248         | 718  | 0.00000    | 25.84      | 53.28   | 4.80    | 0.79    | 0.79              | 7.45     | 0.79    | 252.06   | 87.76       | 43.88  | 19.50  | 0.79   | 0.79             | 12.19   | 0.79   | 209.66   | 2.33    | 0.40       | 0.40       | 0.440      | 0.440      | 0.440      | 0.440      | 0.440      | 26.0        | 63.9   | 0.16  | 62.0       | 31.82 | 62.49       |            |
| 29L         | 718  | 0.00000    | 62.21      | 2.36    | 7.15    | 21.99   | 0.79              | 28.79    | 0.79    | 122.50   | 171.14      | 0.79   | 62.44  | 0.79   | 0.79             | 24.21   | 0.79   | 228.15   | 0.44    | 0.40       | 0.40       | 0.440      | 0.440      | 0.440      | 0.440      | 0.440      | 27.8        | 66.7   | 0.19  | 50.0       | 31.00 | 69.03       |            |
| 50L         | 718  | 0.00000    | 119.97     | 11.88   | 95.51   | 0.79    | 0.79              | 0.79     | 0.79    | 1161.37  | 253.03      | 0.79   | 43.39  | 5.15   | 0.79             | 0.79    | 313.31 | 0.44     | 0.40    | 0.40       | 0.440      | 0.440      | 0.440      | 0.440      | 0.440      | 31.3       | 65.5        | 0.05   | 40.0  | 32.18      | 72.38 |             |            |
| 51L         | 718  | 0.00000    | 25.84      | 53.28   | 7.20    | 0.79    | 0.79              | 13.10    | 0.79    | 201.44   | 87.76       | 43.88  | 19.50  | 0.79   | 0.79             | 12.19   | 0.79   | 209.66   | 13.33   | 26.667     | 0.440      | 96.667     | 0.440      | 0.440      | 0.440      | 136.667    | 28.8        | 73.0   | 0.10  | 50.0       | 31.40 | 65.18       |            |
| 52L         | 718  | 0.002780   | 79.42      | 67.19   | 12.35   | 0.79    | 0.79              | 34.21    | 0.79    | 193.17   | 53.96       | 105.52 | 9.86   | 2.40   | 0.79             | 4.80    | 0.79   | 176.68   | 26.33   | 0.440      | 0.440      | 0.440      | 0.440      | 0.440      | 0.440      | 0.440      | 33.1        | 63.9   | 0.13  | 58.1       | 32.00 | 69.77       |            |
| 378         | 720  | 0.00000    | 228.01     | 4.84    | 4.71    | 11.96   | 0.79              | 16.68    | 0.79    | 270.91   | 389.74      | 4.84   | 7.25   | 79.28  | 0.79             | 0.79    | 447.59 | 0.44     | 0.40    | 0.40       | 0.440      | 0.440      | 0.440      | 0.440      | 0.440      | 28.9       | 56.0        | 0.10   | 50.0  | 31.60      | 56.90 |             |            |
| 37L         | 720  | 0.00000    | 325.70     | 0.79    | 17.20   | 46.94   | 0.79              | 37.07    | 0.79    | 433.45   | 466.70      | 0.79   | 18.98  | 86.26  | 0.79             | 45.24   | 0.79   | 614.84   | 0.44    | 0.40       | 0.40       | 0.440      | 0.440      | 0.440      | 0.440      | 0.440      | 31.7        | 65.8   | 0.04  | 30.0       | 31.26 | 60.94       |            |
| 408         | 720  | 0.00070    | 168.05     | 0.79    | 23.05   | 79.42   | 0.79              | 57.14    | 0.79    | 202.1    | 161.00      | 0.79   | 20.21  | 79.28  | 0.79             | 429.72  | 0.79   | 693.22   | 6.67    | 0.440      | 0.440      | 0.440      | 0.440      | 0.440      | 0.440      | 0.440      | 31.7        | 59.7   | 0.17  | 50.0       | 32.10 | 63.76       |            |
| 418         | 720  | 0.00000    | 139.56     | 0.79    | 4.98    | 52.29   | 0.79              | 41.06    | 0.79    | 607.77   | 161.00      | 0.79   | 20.21  | 79.28  | 0.79             | 429.72  | 0.79   | 693.22   | 0.44    | 0.40       | 0.40       | 0.440      | 0.440      | 0.440      | 0.440      | 0.440      | 28.8        | 56.0   | 0.06  | 40.0       | 31.90 | 60.20       |            |
| 41B         | 720  | 0.00000    | 395.65     | 16.58   | 9.45    | 0.79    | 0.79              | 0.79     | 0.79    | 421.67   | 253.03      | 0.79   | 43.39  | 0.79   | 0.79             | 0.79    | 313.31 | 130.00   | 0.440   | 0.440      | 0.440      | 0.440      | 0.440      | 0.440      | 0.440      | 0.440      | 31.3        | 65.5   | 0.05  | 40.0       | 32.18 | 72.38       |            |
| 41L         | 720  | 0.00000    | 251.50     | 0.79    | 19.19   | 0.79    | 0.79              | 0.79     | 0.79    | 285.04   | 253.03      | 0.79   | 43.39  | 0.79   | 0.79             | 0.79    | 313.31 | 0.44     | 0.40    | 0.40       | 0.440      | 0.440      | 0.440      | 0.440      | 0.440      | 31.0       | 61.8        | 1.45   | 40.0  | 31.88      | 71.16 |             |            |
| 418         | 721  | 0.00070    | 139.56     | 0.79    | 4.95    | 44.50   | 0.79              | 20.42    | 0.79    | 449.94   | 161.00      | 0.79   | 20.21  | 79.28  | 0.79             | 429.72  | 0.79   | 693.22   | 0.44    | 0.40       | 0.40       | 0.440      | 0.440      | 0.440      | 0.440      | 0.440      | 28.8        | 56.0   | 0.06  | 40.0       | 31.90 | 60.20       |            |
| 01L         | 721  | 0.00000    | 442.41     | 0.79    | 17.56   | 92.93   | 0.79              | 75.79    | 0.79    | 633.69   | 443.09      | 0.79   | 22.29  | 112.02 | 0.79             | 27.41   | 0.79   | 614.84   | 0.44    | 0.40       | 0.40       | 0.440      | 0.440      | 0.440      | 0.440      | 0.440      | 31.3        | 60.8   | 0.24  | 40.0       | 29.13 | 70.13       |            |
| 438         | 721  | 0.00000    | 181.11     | 0.79    | 10.93   | 15.22   | 0.79              | 34.30    | 0.79    | 247.35   | 446.70      | 0.79   | 18.98  | 86.26  | 0.79             | 45.24   | 0.79   | 614.84   | 0.44    | 0.40       | 0.40       | 0.440      | 0.440      | 0.440      | 0.440      | 0.440      | 28.7        | 60.8   | 0.12  | 50.0       | 32.30 | 59.78       |            |
| 45L         | 721  | 0.00000    | 323.36     | 0.79    | 17.20   | 46.94   | 0.79              | 37.07    | 0.79    | 433.45   | 466.70      | 0.79   | 18.98  | 86.26  | 0.79             | 45.24   | 0.79   | 614.84   | 0.44    | 0.40       | 0.40       | 0.440      | 0.440      | 0.440      | 0.440      | 0.440      | 31.7        | 65.8   | 0.04  | 30.0       | 31.26 | 60.94       |            |
| 478         | 721  | 0.00040    | 301.53     | 0.79    | 14.05   | 117.28  | 0.79              | 72.72    | 0.79    | 596.48   | 284.04      | 0.79   | 15.12  | 106.32 | 0.79             | 233.68  | 0.79   | 603.06   | 0.44    | 0.40       | 0.40       | 0.440      | 0.440      | 0.440      | 0.440      | 0.440      | 20.000      | 36.2   | 52.7  | 0.07       | 45.0  | 36.70       | 57.78      |
| 721         | 722  | 0.00000    | 123.05     | 0.79    | 12.60   | 90.00   | 0.79              | 186.59   | 0.79    | 610.13   | 284.04      | 0.79   | 15.12  | 106.32 | 0.79             | 233.68  | 0.79   | 603.06   | 0.44    | 0.40       | 0.40       | 0.440      | 0.440      | 0.440      | 0.440      | 0.440      | 20.000      | 36.2   | 52.7  | 0.07       | 45.0  | 36.70       | 57.78      |
| 388         | 722  | 0.00010    | 442.76     | 4.77    | 0.79    | 7.12    | 0.79              | 0.79     | 0.79    | 454.65   | 968.04      | 59.42  | 0.79   | 90.18  | 0.79             | 481.85  | 0.79   | 1770.25  | 143.33  | 0.440      | 0.440      | 0.440      | 0.440      | 0.440      | 0.440      | 0.440      | 0.440       | 35.3   | 54.6  | 0.23       | 50.0  | 30.70       | 53.29      |
| 38L         | 722  | 0.00000    | 69.46      | 19.28   | 0.79    | 120.63  | 0.79              | 65.99    | 0.79    | 149.36   | 968.04      | 59.42  | 0.79   | 20.93  | 0.79             | 481.85  | 0.79   | 1770.25  | 0.44    | 0.40       | 0.40       | 0.440      | 0.440      | 0.440      | 0.440      | 0.440      | 30.8        | 55.8   | 0.10  | 50.0       | 31.80 | 47.34       |            |
| 04L         | 722  | 0.00000    | 442.76     | 4.77    | 0.79    | 7.12    | 0.79              | 0.79     | 0.79    | 454.65   | 968.04      | 59.42  | 0.79   | 90.18  | 0.79             | 481.85  | 0.79   | 1770.25  | 143.33  | 0.440      | 0.440      | 0.440      | 0.440      | 0.440      | 0.440      | 0.440      | 0.440       | 35.3   | 54.6  | 0.23       | 50.0  | 30.70       | 53.29      |
| 388         | 722  | 0.00000    | 85.27      | 99.74   | 26.79   | 7.28    | 0.79              | 0.79     | 0.79    | 219.78   | 273.85      | 111.56 | 70.37  | 22.03  | 0.79             | 7.41    | 0.79   | 475.85   | 0.44    | 5.000      | 0.440      | 15.000     | 0.440      | 0.440      | 0.440      | 20.000     | 30.9        | 81.0   | 0.01  | 104.1      | 31.73 | 80.72       |            |
| 06L         | 725  | 0.00000    | 183.73     | 18.97   | 29.66   | 14.85   | 0.79              | 0.79     | 0.79    | 339.22   | 273.85      | 111.56 | 70.37  | 12.67  | 0.79             | 7.41    | 0.79   | 475.85   | 1.67    | 0.440      | 0.440      | 0.440      | 0.440      | 0.440      | 0.440      | 1.667      | 28.7        | 62.9   | 0.00  | 54.7       | 29.77 | 85.47       |            |
| 088         | 726  | 0.00000    | 118.48     | 111.06  | 12.31   | 0.79    | 0.79              | 0.79     | 0.79    | 290.13   | 119.31      | 62.71  | 2.43   | 12.67  | 0.79             | 7.41    | 0.79   | 475.85   | 1.67    | 0.440      | 0.440      | 0.440      | 0.440      | 0.440      | 0.440      | 1.667      | 28.7        | 62.9   | 0.00  | 54.7       | 29.77 | 85.47       |            |
| 06L         | 726  | 0.00000    | 132.11     | 105.46  | 7.42    | 0.79    | 0.79              | 0.79     | 0.79    | 249.22   | 119.31      | 62.71  | 2.43   | 12.67  | 0.79             | 7.41    | 0.79   | 475.85   | 1.67    | 0.440      | 0.440      | 0.440      | 0.440      | 0.440      | 0.440      | 1.667      | 28.7        | 62.9   | 0.00  | 54.7       | 29.77 | 85.47       |            |
| 078         | 726  | 0.00000    | 127.19     | 12.36   | 0.79    | 0.79    | 0.79              | 0.79     | 0.79    | 249.22   | 119.31      | 62.71  | 2.43   | 12.67  | 0.79             | 7.41    | 0.79   | 475.85   | 1.67    | 0.440      | 0.440      | 0.440      | 0.440      | 0.440      | 0.440      | 1.667      | 28.7        | 62.9   | 0.00  | 54.7       | 29.77 | 85.47       |            |
| 07L         | 726  | 0.00000    | 67.62      | 99.15   | 4.40    | 7.31    | 0.79              | 7.22     | 0.79    | 186.10   | 53.96       | 105.52 | 9.86   | 2.40   | 0.79             | 4.80    | 0.79   | 176.68   | 0.44    | 0.40       | 0.40       | 0.440      | 0.440      | 0.440      | 0.440      | 0.440      | 31.0        | 61.8   | 0.14  | 50.0       | 31.80 | 72.97       |            |
| 328         | 727  | 0.00000    | 615.00     | 14.65   | 24.2    | 65.75   | 0.79              | 0.79     | 11.16   | 734.38   | 242.02      | 9.75   | 12.17  |        |                  |         |        |          |         |            |            |            |            |            |            |            |             |        |       |            |       |             |            |
